# Supplementary material for: ALK is a MYCN target gene and regulates cell migration and invasion in neuroblastoma
Source: PubMed Central journal article supplement — Sci Rep. 2013 Dec 20;3:3450. doi: 10.1038/srep03450 (PMC3868972; doi:10.1038/srep03450), 2013-12-20

## Supplementary Information

***ALK* is a MYCN target gene and regulates cell migration and invasion in neuroblastoma**

Md. Kamrul Hasan, Asmaa Nafady, Atsushi Takatori, Satoshi Kishida, Miki Ohira, Yusuke Suenaga, Shamim Hossain, Jesmin Akter, Atsushi Ogura, Yohko Nakamura, Kenji Kadomatsu and Akira Nakagawara

## Supplemental Materials and methods

**Wound healing assays.** Cells ( $1 \times 10^5$ ) were seeded in six-well plates and allowed to adhere overnight. Cells were then transfected with the expression plasmids. Forty-eight hours after transfection, confluent cell monolayers were manually scratched with a micropipette tip, and allowed to migrate for 16 h.

## Supplementary Figure Legends

**Supplementary Figure S1. MYC proteins enhance the expression of ALK.** (A) MYC proteins enhanced the endogenous mRNA expression of *ALK*. HeLa cells were transfected with *MYCN* or *c-Myc* expression vector. Twenty-four hours after transfection the expression of *ALK*, *MYCN* or *c-Myc* was checked by RT-PCR. (B) and (C) Ectopic expression of *MYCN* induced endogenous protein expression of *ALK*. NBL-S (B) and NLF (C) cells ( $1 \times 10^5$ ) were seeded in six-well plates and allowed to adhere overnight. Cells were then transfected with empty plasmid or *MYCN* expression plasmid in a dose-dependent manner. Forty-eight hours after transfection, cells were lysed and the resulting lysates were subjected to immunoblotting to verify the expression of *ALK* and *MYCN* using anti-*ALK* and anti-*MYCN* antibodies, respectively. Actin was used as control for protein loading.

**Supplementary Figure S2. MYCN and c-Myc both regulates the transcription of ALK.** (A) U2OS cells were transfected with *ALK* (-2056 bp) luciferase reporter construct or empty plasmid. Luciferase reporter assays showed *ALK* promoter activity. (B) Overexpression of *MYCN* enhanced the basal promoter activity of *ALK*. U2OS cells were transfected with *ALK* (-2056 bp) luciferase reporter construct and co-transfected with increasing amounts of *MYCN* expression vector. Luciferase assays were then performed to measure promoter activity. (C) E-box1 and 2 are important for the transcriptional activation of *ALK* gene. Site-specific deletions were introduced into the parental core promoter (-350 bp) luciferase reporter construct at the indicated *MYCN*-binding sites, E1 and E2 (left panel). HeLa cells were simultaneously transfected with parental or deletion mutants of luciferase reporter constructs together with *MYCN* or *c-Myc*

expression vector. The graph shows the results of luciferase activity driven by the expression of MYC proteins.

**Supplementary Figure S3. Delineation of the promoter region of *ALK*.** SK-N-AS (A) and HeLa (B) cells were simultaneously transfected with different deletion luciferase reporter constructs of *ALK* promoter region together with *MYCN* or *c-Myc* expression vector. The graph shows the results of luciferase activity driven by the expression of MYC proteins. Primer sets used for cloning of these *ALK* promoter constructs are as follows: forward primers; For -2056–+30 construct, Fw 5'-GCTCGCTAGCCTCGAACTGTGTGATGTGTTAG-3'; For -984–+30 construct, Fw 5'-GCTCGCTAGCCTCGAGAACCACTTGTATAA-3'; For -350–+30 construct, Fw 5'-GCTCGCTAGCCTCGAAGTTCTCACATTTGCTCC-3'; For -113–+30 construct, Fw 5'-GCTCGCTAGCCTCGAAGTTGGCTTGTGAGC-3'; For -51–+30 construct, Fw 5'-GCTCGCTAGCCTCGATCAGCCAGCTGCAAGTGG-3' and same reverse primer was used for all constructs, Re 5'-TCTTGATATCCTCGAGTACCAGCTGCTACC-3'.

**Supplementary Figure S4. *ALK* expression contributes activation of *AKT*.** (A)

Overexpression of both wild-type (W/T) and mutated *ALK* enhanced constitutive phosphorylation of *ALK* and *AKT*. SK-N-AS, SK-N-DZ, NLF and NBL-S cells ( $1 \times 10^5$ ) were seeded in six-well plates and allowed to adhere overnight. Cells were then transfected with the expression plasmid of wild-type or mutated (F1174L) *ALK* or empty plasmid. Forty-eight hours after transfection, cells were lysed and analyzed by immunoblotting with anti-*ALK*, anti-phosphorylated *ALK* Tyr-1604, anti-*AKT*, anti-phosphorylated *AKT* Ser-473 and anti-Actin antibody. (B)

siRNA-mediated knockdown of endogenous *ALK* suppressed phosphorylation of *AKT*. NBL-S cells ( $1 \times 10^5$ ) were seeded in six-well plates and allowed to adhere overnight. Cells were then transfected with control siRNA or siRNA targeting *ALK*. Seventy-two hours after transfection, cells were lysed and the cell lysates were subjected to immunoblotting using anti-*ALK*, anti-phosphorylated *ALK*, anti-*AKT* and anti-phosphorylated *AKT* antibody. Actin was used as control for protein loading.

**Supplementary Figure S5. ALK enhances cell migration after wounding.** SH-SY5Y (A), SK-N-AS (B) and HeLa (C) cells were transfected with the expression plasmids for *ALK* or *MYCN* or empty plasmid and cultured to monolayer confluence. Forty-eight hours after transfection cells were wounded and incubated for 16 h, and then migrating cells were counted. Single plus (+) indicates 1 µg and double plus (++) indicates 2 µg expression plasmid used for transfection. All experiments were performed in triplicate.

**Supplementary Figure S6. ALK contributes to cell migration and invasion. (A)**

Overexpression of *ALK* enhanced cell migration and invasion. HeLa cells were transfected with pcDNA3-*ALK* or empty plasmid, and ALK ectopic expression (220 kDa) was determined by immunoblotting (left). Migration assays (middle) and invasion assays (right) were performed in Boyden chambers. (B) siRNA-mediated knockdown of *ALK* suppressed cell migration and invasion. SK-N-DZ cells were transfected with control siRNA or with siRNA targeting *ALK*. The knockdown of *ALK* mRNA expression in SK-N-DZ cells was confirmed by qRT-PCR (left). Migration assays (middle) and invasion assays (right) were performed as indicated above. All experiments were performed in triplicate.

**Supplementary Figure S7. Endogenous expression of ALK in NBL and non-NBL cell lines.**

(A) mRNA expression level and missense mutations of *ALK* in NBL cell lines. qRT-PCR and DNA sequencing of *ALK* gene was applied to 27 indicated human neuroblastoma tumor cell lines. (B) mRNA expression level of *ALK* in non-NBL cell lines. qRT-PCR was performed on 19 indicated human non-neuroblastoma tumor cell lines.

**Supplementary Figure S8. Effects of crizotinib and CH5424802 on NBL cells.** (a) Crizotinib

(left) or CH5424802 (right) inhibited the proliferation of NBL cells. *MYCN*-non-amplified (SK-N-AS) or amplified (NLF and SK-N-DZ) NBL cells were treated with various concentrations of crizotinib or CH5424802 for 72h and cell proliferation was measured. The values are the mean ± SD of triplicate experiments.

(b) Crizotinib or CH5424802 suppressed cell migration of MYCN amplified NBL cells. SK-N-DZ cells were treated with 50 nM or 200 nM of crizotinib, CH5424802 or DMSO as control, and cell migration assay was performed. The values are the mean  $\pm$  SD of triplicate experiments.

## Supplementary Figure S1

**A**

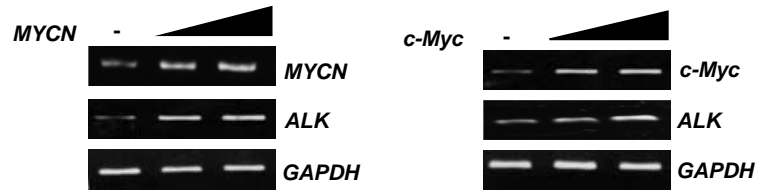

**B**

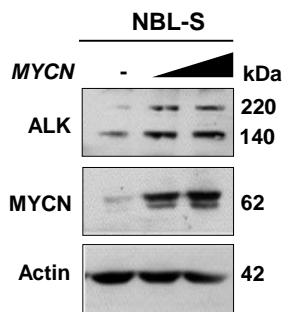

**C**

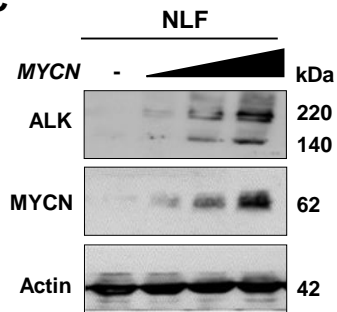

## Supplementary Figure S2

**A**

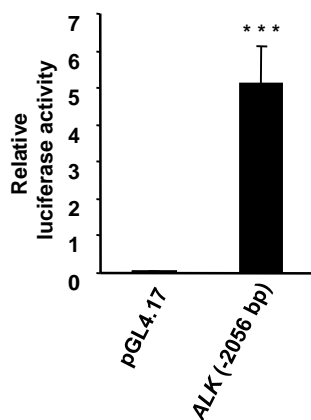

**B**

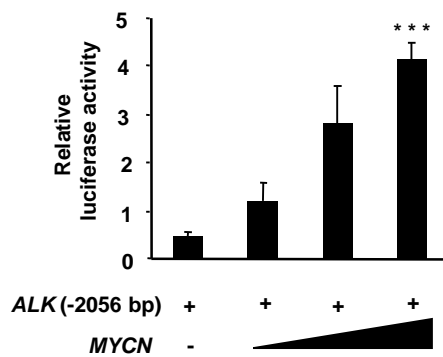

**C**

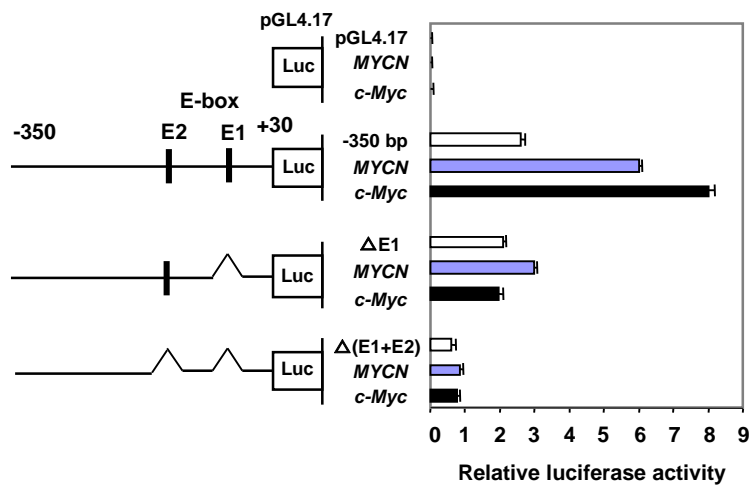

## Supplementary Figure S3

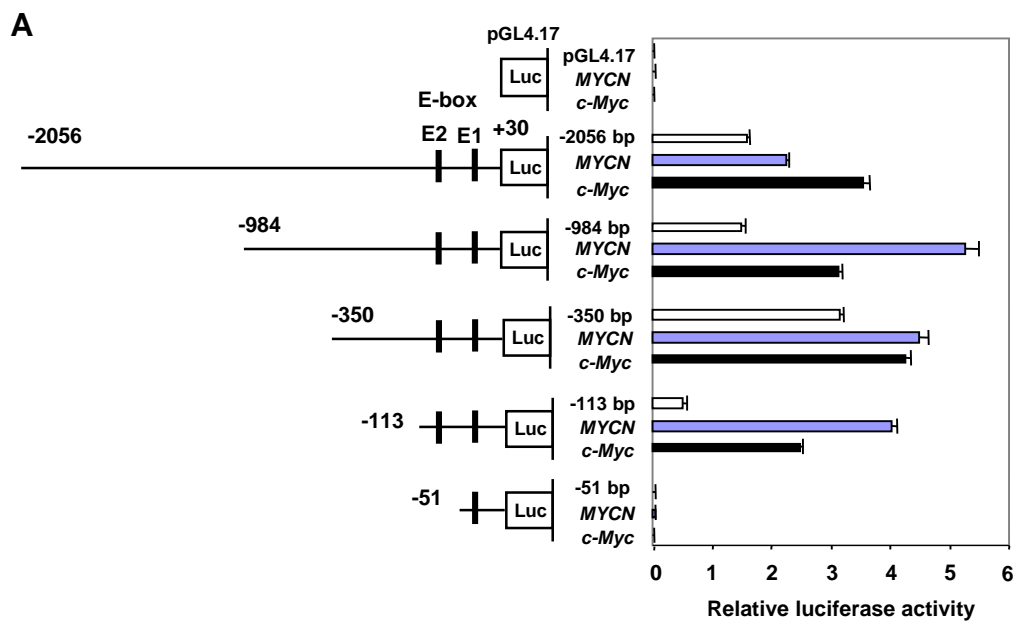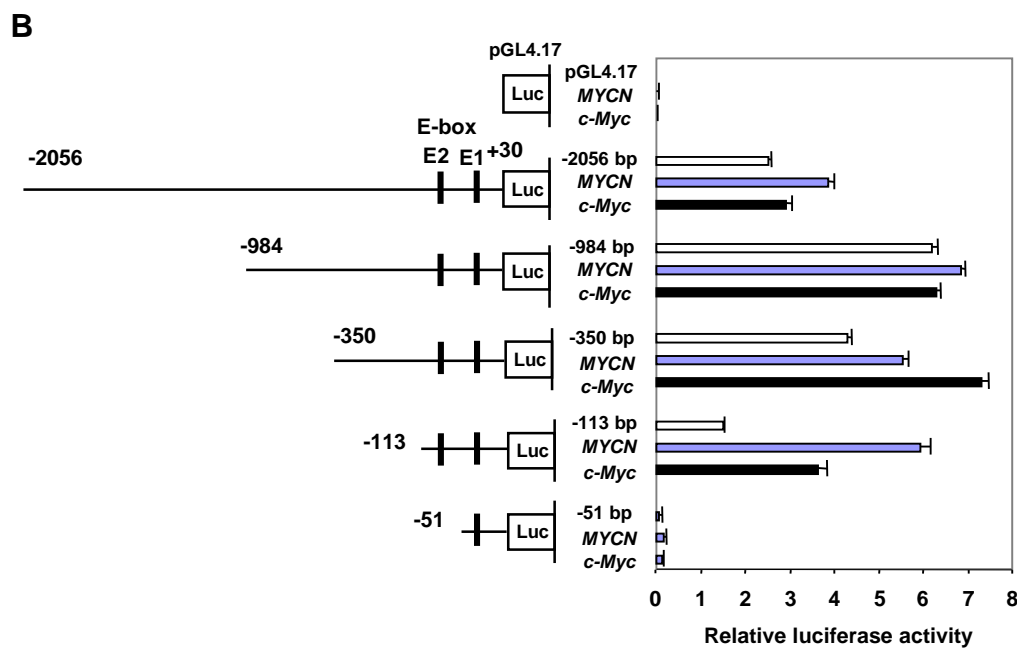



# Supplementary Figure S4

**A**

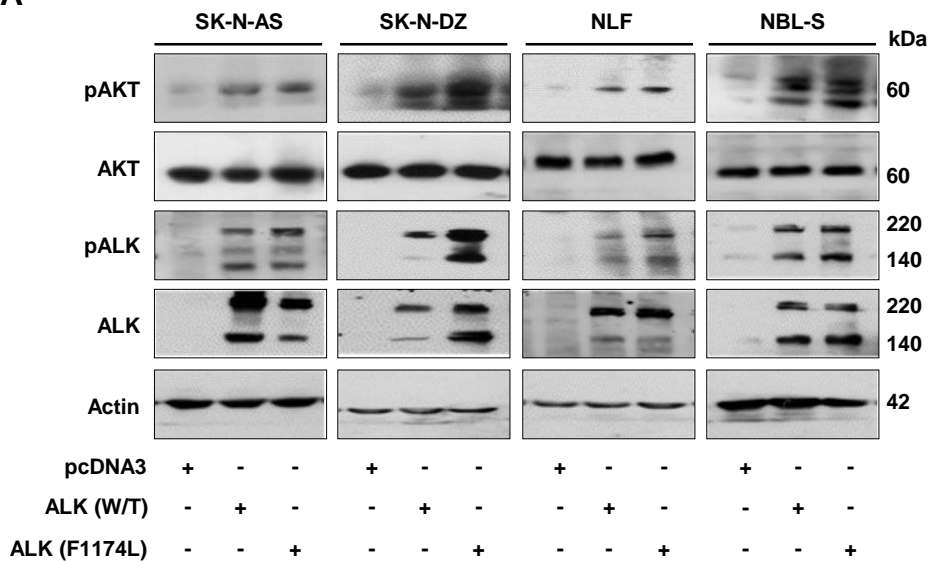

**B**

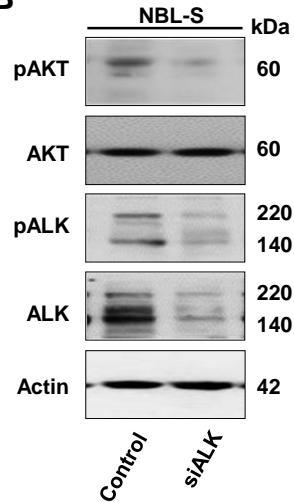

## Supplementary Figure S5

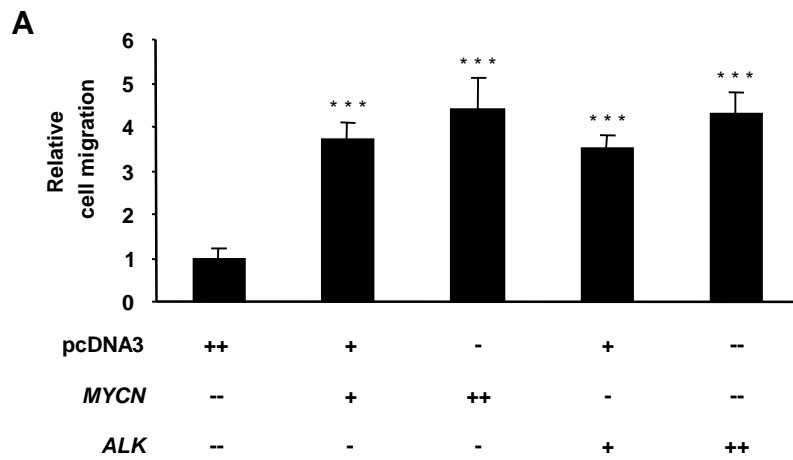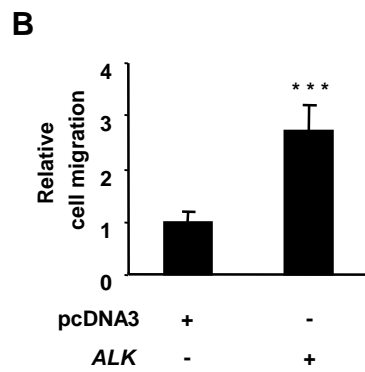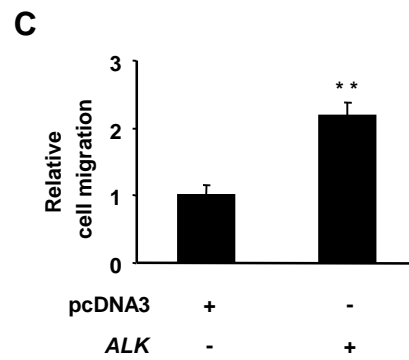

## Supplementary Figure S6

**A**

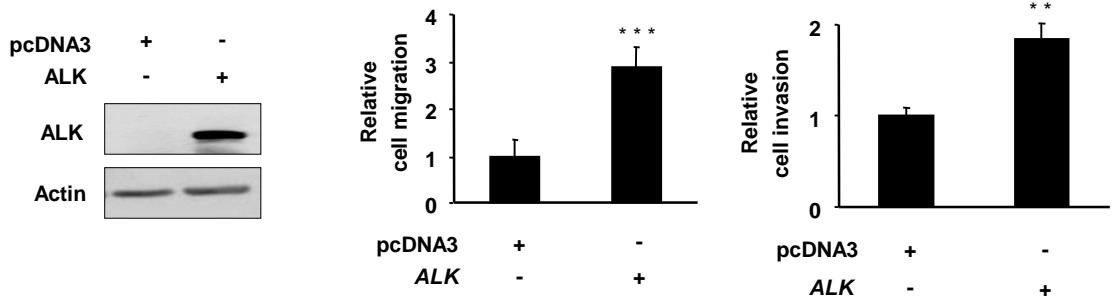

**B**

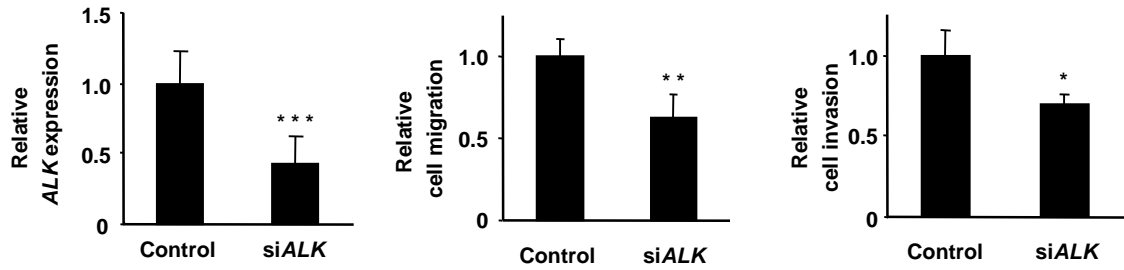

# Supplementary Figure S7

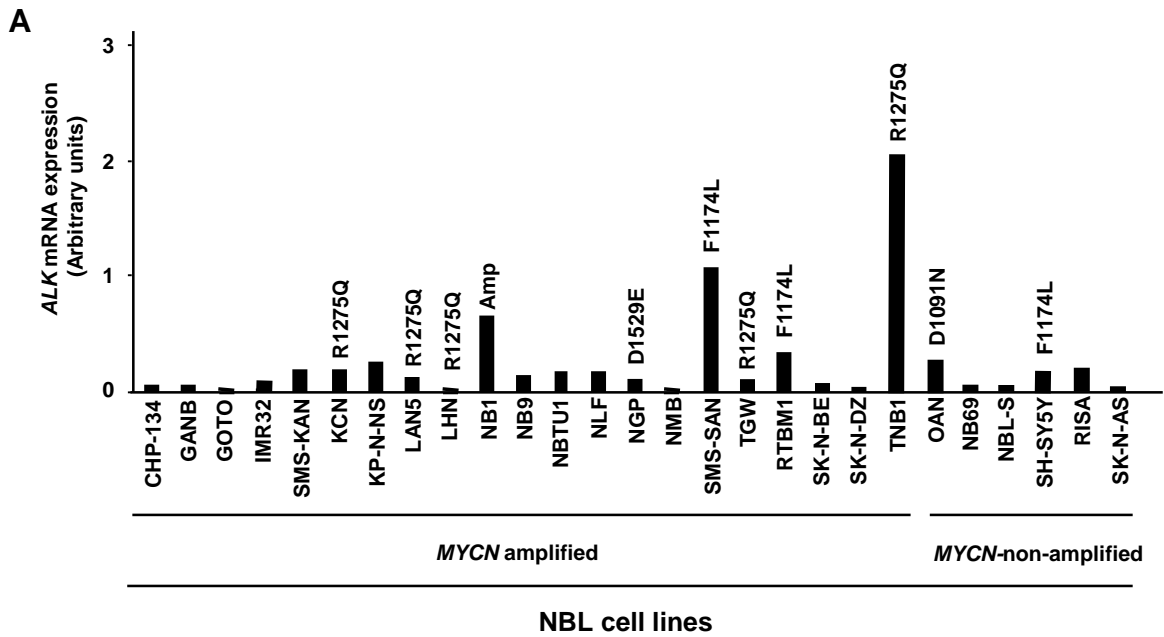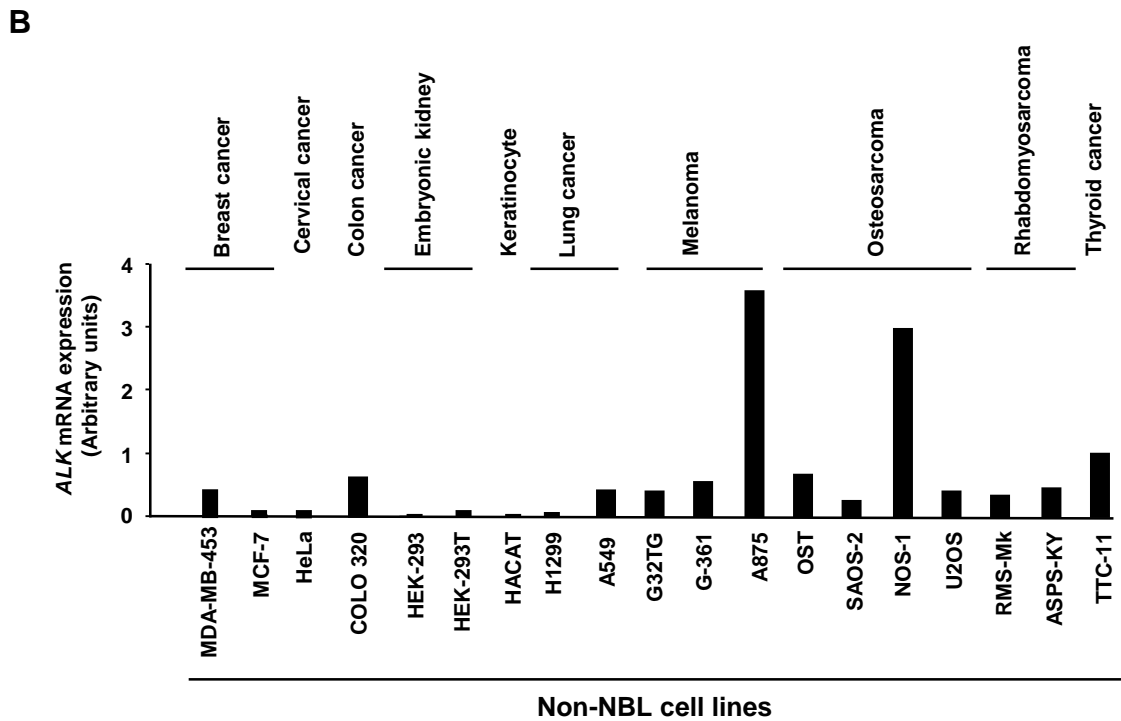

# Supplementary Figure S8

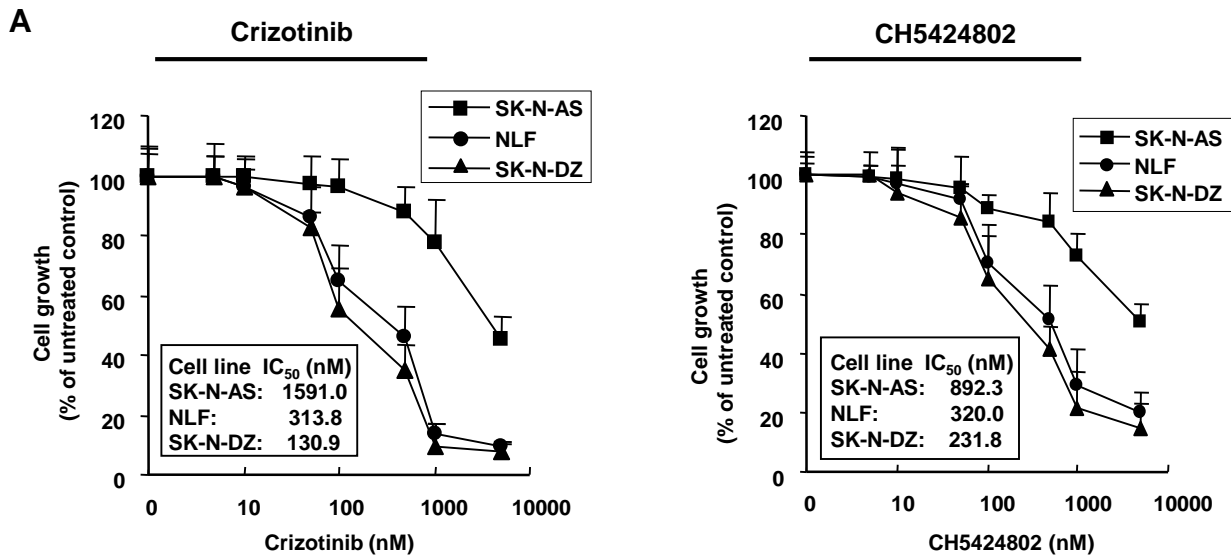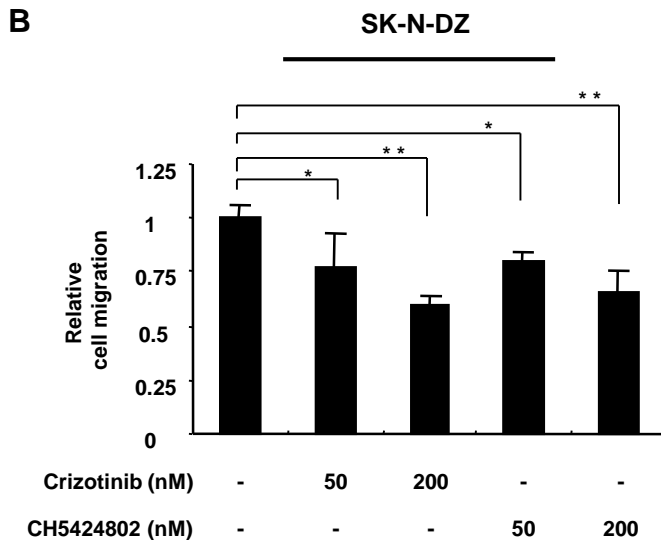

**Supplementary Figure S9. Full-length images of the blots presented in the main figure.**

For Figure 5a

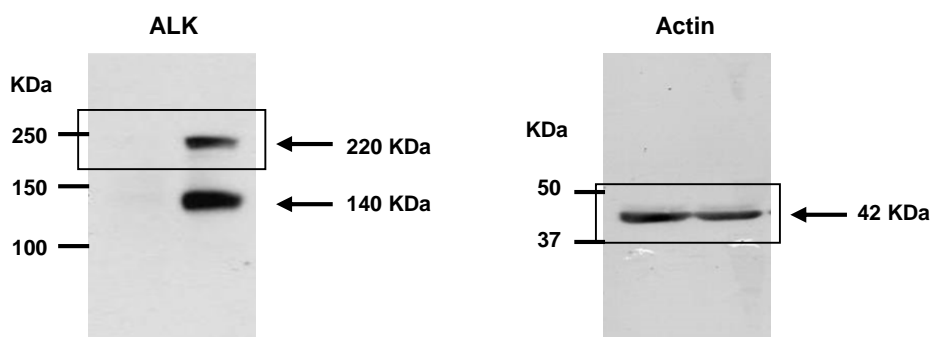

Supplement: srep03450-s1.pdf [file srep03450-s1.pdf]
